# Supplementary material
Source: publisher figshare collection journal article supplement (https://gsapubs.figshare.com/ndownloader/files/23319146)
Supplement: Supplementary file 1 [file 23319146]

## Sheet: Sheet1
Table DR3. Jacks River formation detrital U-Pb isotopic data
Grain Name	Atomic Ratios 204Pb/206Pb	206Pb/238U	1s error	207Pb/235U*	1s error*	207Pb/206Pb	1s error	Age 206Pb/238U	2s error	Age 207Pb/235U*	2s error*	Age 207Pb/206Pb	2s error	Discordance 207Pb/206Pb	Discordance 207Pb/235U
TEN015_001	0.00353965	0.18155	0.00291625	2.19309	0.0366692	0.0876109	0.000406343	1075.4	31.7813	1178.79	23.1871	1373.5	17.8449	21.7035	8.77053
TEN015_002	0.0120697	0.168555	0.00279916	1.73041	0.0317917	0.0744569	0.000584801	1004.11	30.8456	1019.85	23.5075	1053.5	31.6464	4.68771	1.5431
TEN015_003	0.000665717	0.194096	0.00333122	2.08491	0.036468	0.077906	0.000262551	1143.49	35.9165	1143.79	23.8645	1144	13.398	0.0448997	0.0269637
TEN015_004	0.00298304	0.196362	0.00342218	2.16825	0.0391844	0.0800848	0.00038255	1155.71	36.826	1170.86	24.9609	1199	18.8349	3.61063	1.2939
TEN015_005	0.00625371	0.171329	0.00383782	1.73504	0.0399813	0.0734477	0.00039652	1019.4	42.1725	1021.57	29.4697	1026	21.8424	0.643628	0.21306
TEN015_006	0.00193114	0.189367	0.00320885	2.12435	0.0413729	0.0813615	0.000780685	1117.91	34.7362	1156.69	26.7137	1230	37.6673	9.11303	3.35277
TEN015_007	0.00177825	0.193187	0.00331862	2.11178	0.0377341	0.079281	0.000389557	1138.58	35.808	1152.6	24.4762	1179	19.4316	3.42837	1.2163
TEN015_008	0.00415144	0.185485	0.00299332	1.99105	0.0330395	0.0778523	0.000300542	1096.84	32.512	1112.42	22.308	1143	15.3467	4.03892	1.40111
TEN015_009	0.00169377	0.213289	0.00377828	2.46952	0.0448068	0.0839736	0.00032919	1246.27	40.0856	1263.09	26.057	1291.5	15.2567	3.50177	1.33114
TEN015_010	0.00139069	0.193073	0.00528999	2.1286	0.0590962	0.0799598	0.000357396	1137.96	57.0376	1158.07	37.9994	1195.5	17.6366	4.81271	1.73647
TEN015_011	0.00111147	0.171785	0.00276791	1.78573	0.0311638	0.075393	0.000505095	1021.9	30.4177	1040.22	22.5908	1078.5	26.8944	5.24772	1.76071
TEN015_012	0.00351657	0.196888	0.00363064	2.33293	0.0549673	0.0859373	0.00125985	1158.54	39.0486	1222.31	33.2169	1336.5	56.6902	13.3153	5.21694
TEN015_013	0.001324	0.192364	0.00364773	2.06667	0.0399288	0.0779194	0.000287937	1134.13	39.3808	1137.77	26.2691	1144.5	14.6887	0.90569	0.319897
TEN015_014	0.00318849	0.193759	0.00309775	2.65505	0.118826	0.0993822	0.00415331	1141.67	33.4119	1315.98	64.9665	1612.5	155.69	29.1988	13.2457
TEN015_015	0.0128961	0.166831	0.00484651	3.39672	0.300247	0.147666	0.0123222	994.595	53.4386	1503.56	134.142	2319	286.155	57.111	33.8508
TEN015_016	0.00833785	0.108057	0.00221454	2.02489	0.0719133	0.135908	0.00394057	661.435	25.7408	1123.84	47.7118	2175.5	100.984	69.5962	41.1453
TEN015_016	0.000791772	0.164663	0.00265888	1.77872	0.0342366	0.0783449	0.000820371	982.606	29.3994	1037.66	24.8669	1155.5	41.5519	14.9627	5.30557
TEN015_017	0.00936575	0.168514	0.00277945	1.82259	0.0328476	0.0784422	0.000569464	1003.89	30.6297	1053.56	23.4952	1158	28.7966	13.3084	4.71488
TEN015_018	0.00627455	0.169949	0.00277769	1.76872	0.0351106	0.0754811	0.000850019	1011.8	30.5728	1034	25.5893	1081	45.1871	6.40179	2.14701
TEN015_019	0.0131453	0.165456	0.00294008	2.54331	0.184601	0.111485	0.00784358	986.995	32.4825	1284.46	103.131	1823.5	255.265	45.8736	23.1586
TEN015_020	0.00409331	0.195629	0.00327109	2.1662	0.0382447	0.0803089	0.000454796	1151.76	35.2238	1170.2	24.3815	1204.5	22.3118	4.37851	1.57601
TEN015_021	0.00359056	0.162704	0.00272049	1.64056	0.0288999	0.0731294	0.000405183	971.754	30.1304	985.877	22.1041	1017.5	22.4424	4.4959	1.4325
TEN015_022	0.00148978	0.191775	0.00342429	2.3227	0.0490468	0.0878414	0.000989708	1130.95	36.9903	1219.19	29.7558	1379	43.3066	17.9879	7.23761
TEN015_023	0.00133985	0.161624	0.00282438	1.60271	0.0287985	0.0719197	0.000300513	965.767	31.3086	971.22	22.3455	983.5	17.0139	1.80307	0.561511
TEN015_024	0.00258323	0.528167	0.00884941	13.711	0.235277	0.188277	0.00069679	2733.64	74.4429	2729.82	32.22	2727	12.1894	-0.243321	-0.139899
TEN015_025	0.00228273	0.211065	0.00350183	2.40561	0.0408602	0.0826623	0.000300378	1234.45	37.225	1244.21	24.2187	1261	14.2021	2.10557	0.784636
TEN015_026	0.00103153	0.222539	0.00367651	2.61045	0.0440157	0.0850762	0.00028651	1295.23	38.7129	1303.52	24.6065	1317	13.0584	1.65264	0.635303
TEN015_027	0.00651262	0.210211	0.00355656	2.591	0.101212	0.0893945	0.00314661	1229.9	37.8326	1298.03	56.4423	1412.5	134.68	12.9274	5.24874
TEN015_028	0.000494675	0.173214	0.0028046	1.85501	0.0309591	0.0776716	0.000313969	1029.76	30.7829	1065.16	21.9015	1138	16.0846	9.51139	3.32329
TEN015_029	0.01211	0.196601	0.00362694	3.06684	0.252464	0.113137	0.0090741	1157	39.0183	1424.38	122.303	1850	290.086	37.4594	18.7714
TEN015_030	0.00183354	0.172147	0.00309607	1.77482	0.0327439	0.0747742	0.000307135	1023.9	34.0087	1036.23	23.8223	1062	16.5294	3.58762	1.19016
TEN015_031	0.00256294	0.165598	0.00300977	1.77178	0.0410168	0.0775984	0.00111217	987.779	33.2474	1035.12	29.8296	1136.5	57.0316	13.0859	4.57335
TEN015_032C	0.00318844	0.156417	0.00261056	1.55094	0.0275799	0.0719137	0.000441087	936.802	29.0713	950.821	21.837	983	24.9808	4.69972	1.47441
TEN015_032R	0.00756664	0.15714	0.00255637	1.71282	0.0520734	0.0790543	0.00202981	940.832	28.4507	1013.29	38.6097	1173	101.646	19.7927	7.15091
TEN015_033	0.000872083	0.192849	0.00343864	2.0845	0.0378162	0.0783938	0.000261809	1136.75	37.1116	1143.66	24.7447	1156.5	13.252	1.70734	0.603611
TEN015_034	0.00180953	0.191717	0.00329825	2.11749	0.0385209	0.0801049	0.000473358	1130.63	35.6323	1154.46	24.9379	1199.5	23.2983	5.7414	2.06394
TEN015_035	0.000775609	0.17615	0.00297394	1.80852	0.0312458	0.0744627	0.000272877	1045.87	32.5578	1048.49	22.4672	1054	14.7619	0.77095	0.249399
Notes:
*235U calculated from 238U
Age discordances calculated vs. 207Pb/206Pb and 207Pb/235U as shown
Jack's River formation carbonate meta-breccia (UTM Z 16: 716684mE, 3873944mN)
